# Supplementary material for: Poor self-reported adherence to COVID-19-related quarantine/isolation requests, Norway, April to July 2020
Source: PubMed Central journal article supplement (PMC7502884; doi:10.2807/1560-7917.es.2020.25.37.2001607), 2020-09-17
Supplement: 20-01607_Supplementarymaterial.pdf [file 20-01607_Supplementarymaterial.pdf]

*This supplementary material is hosted by Eurosurveillance as supporting information alongside the article 'Poor self-reported adherence to COVID-19-related quarantine/isolation requests, Norway, April to July 2020', on behalf of the authors, who remain responsible for the accuracy and appropriateness of the content. The same standards for ethics, copyright, attributions and permissions as for the article apply. Supplements are not edited by Eurosurveillance and the journal is not responsible for the maintenance of any links or email addresses provided therein.*

**SUPPLEMENTARY TABLE.** Quarantine/isolation request and adherence, overall and for those who reported to have suffered from COVID-19 compatible symptoms, COVID-19 quarantine/isolation study, Norway, 2020.

|                               |                                                          | Yes                                                | No    | Prefer not to answer or do not know | Totals |
|-------------------------------|----------------------------------------------------------|----------------------------------------------------|-------|-------------------------------------|--------|
| <b>Variable</b>               | <b>Reported symptoms<sup>a</sup></b>                     | <b>Number of events with available information</b> |       |                                     |        |
| Quarantine/isolation requests | Overall                                                  | 574                                                | 3,833 | 118                                 | 4525   |
|                               | Symptoms                                                 | 174                                                | 918   | 30                                  | 1,122  |
|                               | No Symptoms                                              | 393                                                | 2,893 | 77                                  | 3,363  |
| Quarantine/isolation events   | Overall                                                  | 417                                                | 4,050 | 58                                  | 4,525  |
|                               | While reporting a request                                | 204                                                | 357   | 13                                  | 574    |
|                               | Symptoms                                                 | 198                                                | 904   | 20                                  | 1,122  |
|                               | No Symptoms                                              | 217                                                | 3,116 | 30                                  | 3,363  |
| Adherence events <sup>b</sup> | Overall                                                  | 204                                                | 357   | 13                                  | 574    |
|                               | Symptoms                                                 | 116                                                | 54    | 4                                   | 174    |
|                               | No Symptoms                                              | 8                                                  | 298   | 8                                   | 393    |
| Non-adherence events          | Overall                                                  | 357                                                | 204   | 13                                  | 574    |
|                               | Symptoms                                                 | 54                                                 | 116   | 4                                   | 174    |
|                               | No Symptoms                                              | 298                                                | 87    | 8                                   | 393    |
|                               | <b>Number of participants with available information</b> |                                                    |       |                                     |        |
| Quarantine/isolation requests | Overall                                                  | 402                                                | 1,240 | 62                                  | 1,704  |
|                               | Symptoms                                                 | 125                                                | 523   | 23                                  | 671    |
|                               | No Symptoms                                              | 297                                                | 1,093 | 47                                  | 1,437  |
| Quarantine/isolation events   | Overall                                                  | 298                                                | 1,375 | 31                                  | 1,704  |
|                               | Symptoms                                                 | 148                                                | 509   | 14                                  | 671    |
|                               | No Symptoms                                              | 170                                                | 1,247 | 20                                  | 1,437  |
| Adherence events <sup>b</sup> | Overall                                                  | 154                                                | 239   | 9                                   | 402    |
|                               | Symptoms                                                 | 85                                                 | 39    | 1                                   | 125    |
|                               | No Symptoms                                              | 75                                                 | 215   | 7                                   | 297    |
| Non-adherence events          | Overall                                                  | 270                                                | 129   | 3                                   | 402    |

<sup>a</sup> Symptoms that may be compatible with COVID-19 were defined as: fever or high temperature, a cough that has lasted for at least several hours, shortness of breath, aches and pains (e.g. in back, neck, shoulders or joints), blocked nose, sore throat and feeling unusually tired.

<sup>b</sup> Adherence was defined as reporting to have received a request to go into quarantine/isolation for the last 7 days and reported as the percentage having done that at least one day during the period.
